# Supplementary material
Source: PubMed Central journal article supplement (PMC2882131)
Supplement: supp_137.13.2117_DEV050351tableS1.pdf [file supp_137.13.2117_DEV050351tableS1.pdf]

**Table S1. *Tor* mosaic GSC loss and low follicle cell numbers are independent of *Atg7***

| Strain <sup>a</sup>                                                         | % GSC loss <sup>b</sup> | % GFP-negative follicle cells <sup>c</sup> |
|-----------------------------------------------------------------------------|-------------------------|--------------------------------------------|
| <i>FRT40A</i> control                                                       | 4.8% (21) <sup>d</sup>  | 46.2% (4673) <sup>e</sup>                  |
| <i>FRT40A</i> control ( <i>Atg7</i> <sup>d4</sup> bkgd) <sup>f</sup>        | 5.0% (20) <sup>g</sup>  | 42.4% (5565)* <sup>h</sup>                 |
| <i>Tor</i> <sup>W1251R</sup>                                                | 27.5% (40)              | 12.1% (3629)                               |
| <i>Tor</i> <sup>W1251R</sup> ( <i>Atg7</i> <sup>d4</sup> bkgd) <sup>f</sup> | 20.0% (40) <sup>g</sup> | 6.0% <sup>g</sup> (4368)* <sup>h</sup>     |
| <i>Tor</i> <sup>P2293L</sup>                                                | 44.1% (34)              | 17.1% (6401)                               |
| <i>Tor</i> <sup>P2293L</sup> ( <i>Atg7</i> <sup>d4</sup> bkgd) <sup>f</sup> | 35.0% (23) <sup>g</sup> | 5.0% <sup>g</sup> (2945)* <sup>h</sup>     |

<sup>a</sup>Clones were analyzed 10 days after clone induction.

<sup>b</sup>Percentage of germaria with GFP-negative cystoblasts or cysts but lacking their GFP-negative GSC mother (which indicates recent GSC loss) relative to the total number of ovarioles with a mosaic germ line.

<sup>c</sup>Percentage of GFP-negative follicle cells relative to the total number of follicle cells analyzed.

<sup>d</sup>Total number of germaria with mosaic germline analyzed is shown in parentheses.

<sup>e</sup>Total number of follicle cells analyzed is shown in parentheses.

<sup>f</sup>Clones were generated in *Atg7*<sup>d4</sup> homozygous background.

<sup>g</sup>There is no statistically significant difference between results in wild-type versus *Atg7*<sup>d4</sup> background.

<sup>h</sup>The *Atg7*<sup>d4</sup> mutation does not rescue of the *Tor* mutant phenotype, but the percentage of GFP-negative follicle cells is significantly smaller in the *Atg7*<sup>d4</sup> background. \*,  $P < 0.001$ .
