# Supplementary material
Source: PubMed Central journal article supplement (PMC2882131)
Supplement: supp_137.13.2117_DEV050351tableS2.pdf [file supp_137.13.2117_DEV050351tableS2.pdf]

**Table S2. *Tor* does not appear to regulate FSC maintenance**

| Strain                       | 4 days <sup>a</sup>                 | 8 days    | 11 days  | 12 days   | 18 days   | 25 days   |
|------------------------------|-------------------------------------|-----------|----------|-----------|-----------|-----------|
| <b>Experiment 1</b>          |                                     |           |          |           |           |           |
| <i>FRT40A</i> control        | 57% <sup>b</sup> (101) <sup>c</sup> | 55% (93)  | --       | 47% (72)  | --        | --        |
| <i>Tor</i> <sup>P2293L</sup> | 95% (93)                            | 70% (98)  | --       | 69% (75)  | --        | --        |
| <i>Tor</i> <sup>W1251R</sup> | 87% (195)                           | 54% (214) | --       | 39% (198) | --        | --        |
| <i>FRT82B</i> control        | 92% (100)                           | 71% (108) | --       | 61% (81)  | --        | --        |
| <i>Tsc1</i> <sup>Q87X</sup>  | 81% (99)                            | 84% (115) | --       | 66% (76)  | --        | --        |
| <b>Experiment 2</b>          |                                     |           |          |           |           |           |
| <i>FRT40A</i> control        | --                                  | --        | 40% (67) | --        | 33% (57)  | 13% (62)  |
| <i>Tor</i> <sup>P2293L</sup> | --                                  | --        | 43% (28) | --        | 24% (51)  | 5.0% (40) |
| <i>Tor</i> <sup>W1251R</sup> | --                                  | --        | 30% (77) | --        | 20% (50)  | 5.5% (55) |
| <b>Experiment 3</b>          |                                     |           |          |           |           |           |
| <i>FRT40A</i> control        | --                                  | --        | 25% (67) | --        | 41% (63)  | 9.1% (55) |
| <i>Tor</i> <sup>P2293L</sup> | --                                  | --        | 40% (35) | --        | 21% (67)  | 1.6% (61) |
| <i>Tor</i> <sup>W1251R</sup> | --                                  | --        | 20% (70) | --        | 3.4% (87) | 13% (55)  |
| <b>Experiment 4</b>          |                                     |           |          |           |           |           |
| <i>FRT40A</i> control        | --                                  | --        | 46% (50) | --        | 37% (49)  | 11% (56)  |
| <i>Tor</i> <sup>P2293L</sup> | --                                  | --        | 15% (47) | --        | 31% (51)  | 17% (41)  |
| <i>Tor</i> <sup>W1251R</sup> | --                                  | --        | 41% (56) | --        | 16% (70)  | 14% (50)  |
| <b>Experiment 5</b>          |                                     |           |          |           |           |           |
| <i>FRT40A</i> control        | 62% (183)                           | --        | --       | 45% (121) | --        | --        |
| <i>Tor</i> <sup>P2293L</sup> | 66% (67)                            | --        | --       | 58% (139) | --        | --        |
| <i>Tor</i> <sup>W1251R</sup> | 41% (119)                           | --        | --       | 23% (141) | --        | --        |

<sup>a</sup>Number of days after clone induction.<sup>b</sup>Percentage of germlaria containing at least one GFP-negative FSC.<sup>c</sup>Total number of germlaria analyzed is shown in parentheses.
