# Supplementary material
Source: PubMed Central journal article supplement (PMC2882131)
Supplement: supp_137.13.2117_DEV050351tableS3.pdf [file supp_137.13.2117_DEV050351tableS3.pdf]

**Table S3. *Tor* activity in follicle cells controls the growth of underlying germline cysts**

| Strain                                                | Time <sup>a</sup> | % of wild-type cysts with altered growth <sup>b</sup> |
|-------------------------------------------------------|-------------------|-------------------------------------------------------|
| <i>FRT40A</i> control                                 | 6                 | delayed-0% (15) <sup>c</sup>                          |
|                                                       | 10                | delayed-0% (13)                                       |
| <i>Tor</i> <sup>R248X</sup>                           | 6                 | delayed-75% (4)                                       |
| <i>Tor</i> <sup>P2293L</sup>                          | 6                 | delayed-85.7% (23)                                    |
|                                                       | 10                | delayed-93% (15)                                      |
| <i>Tor</i> <sup>W1251R</sup>                          | 6                 | delayed-50% (2)                                       |
|                                                       | 10                | delayed-95% (19)                                      |
| <i>Tor</i> <sup>W1251R</sup> <i>Thor</i> <sup>2</sup> | 10                | delayed-100% (7)                                      |
| <i>Tsc1</i> <sup>Q87X</sup>                           | 10                | accelerated-80% (5)                                   |
| <i>Tsc1</i> <sup>Q87X</sup> <i>InR</i> <sup>E19</sup> | 10                | accelerated-80% (5)                                   |

<sup>a</sup>Number of days after clone induction.

<sup>b</sup>Percentage of wild-type germline cysts surrounded by at least one-third GFP-negative follicle cells showing either delayed or accelerated growth (see Materials and methods).

<sup>c</sup>Number of wild-type cysts surrounded by at least one-third GFP-negative follicle cells analyzed.
